# Supplementary material for: Defect effects on the electronic, valley, and magnetic properties of the two-dimensional ferrovalley material VSi2N4
Source: Royal Society of Chemistry journal article supplement (doi:10.1039/d4dt00856a), 2024-01-01
Supplement: d4dt00856a1.pdf [file d4dt00856a1.pdf]

## Defect effects on the electronic, valley, and magnetic properties of two-dimensional ferrovalley material $\text{VSi}_2\text{N}_4$

Ming-Yang Liu<sup>1\*</sup>, Gaung-Qiang Li, Yao He<sup>2</sup>, and Kai Xiong<sup>3</sup>

<sup>1</sup>*Department of Physics and Electronic Science, Chuxiong Normal University, Chuxiong 675000, P.*

*R. China*

<sup>2</sup>*Department of Physics, Yunnan University, Kunming 650091, P. R. China*

<sup>3</sup>*Materials Genome Institute, School of Materials and Energy, Yunnan University, Kunming 650091,*

*P. R. China*

\*Corresponding author: Ming-Yang Liu (E-mail: [18788549890@163.com](mailto:18788549890@163.com)); Yao He (E-mail: [yhe@ynu.edu.cn](mailto:yhe@ynu.edu.cn))

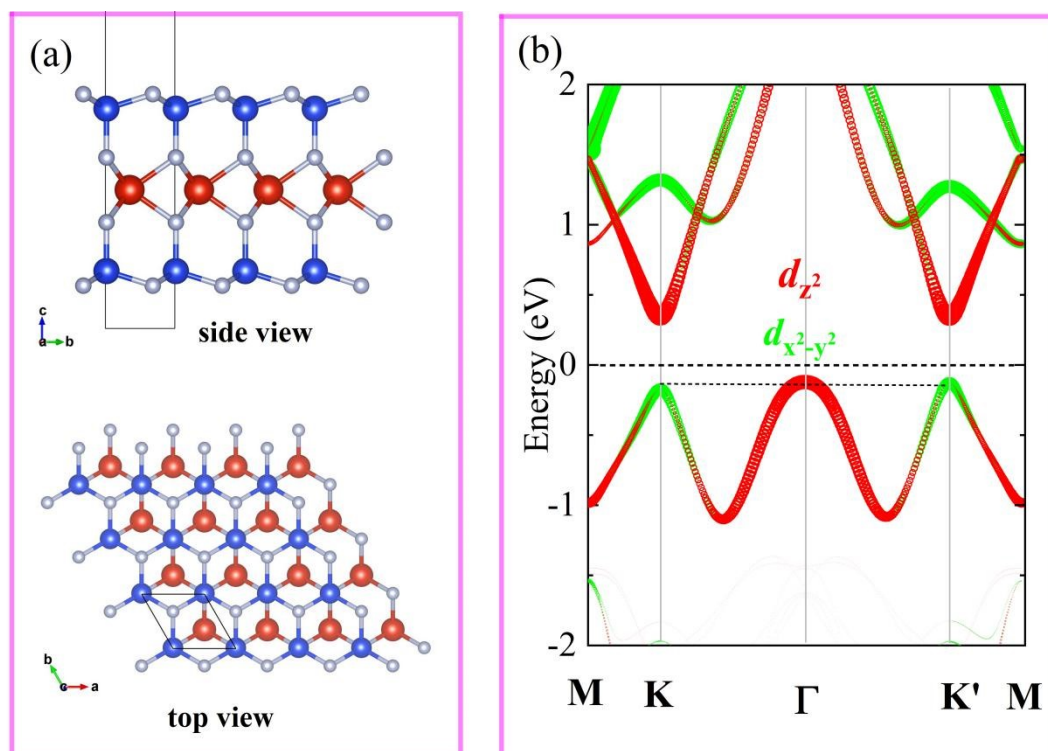

FIG. S1 (a) Lattice structure of  $\text{VSi}_2\text{N}_4$ , in which the gray, blue, and red balls denote N, Si, and V atoms, respectively. (b) Orbital projected band structure of the pristine  $\text{VSi}_2\text{N}_4$ . The Fermi level is set at the zero energy.

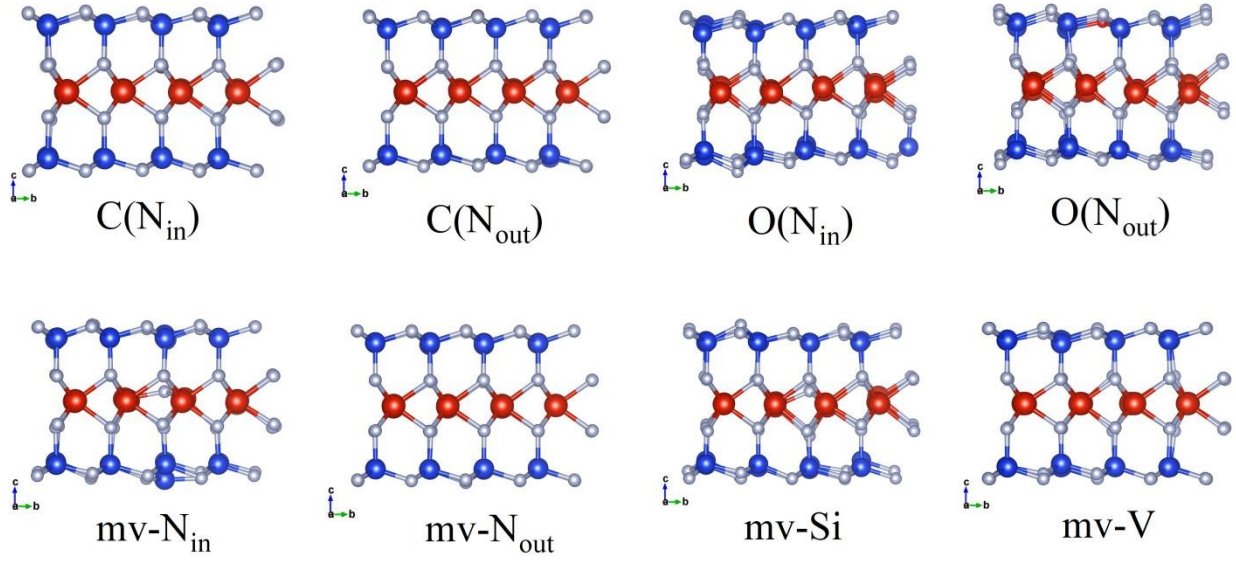

FIG. S2 The crystal structures of the defective  $VSi_2N_4$  after AIMD. The gray, blue, and red balls denote N, Si, and V atoms, respectively.

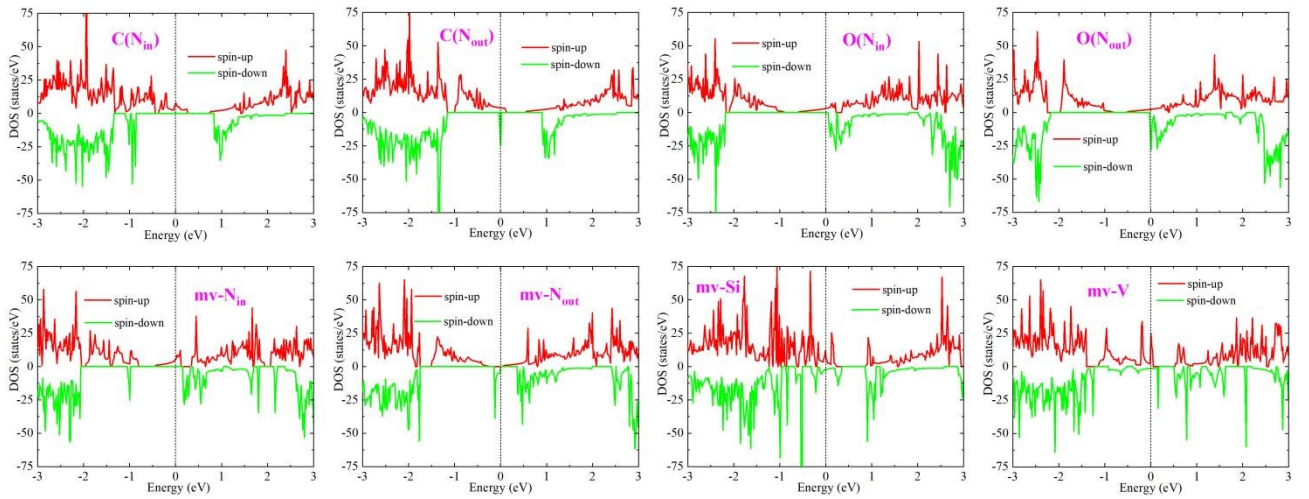

FIG. S3 The spin-polarized density of states of the doped and defected  $VSi_2N_4$  with  $3 \times 3 \times 1$  supercell. The red and green lines denote the spin-up and spin-down channels, respectively, and the Fermi level is set at zero energy.

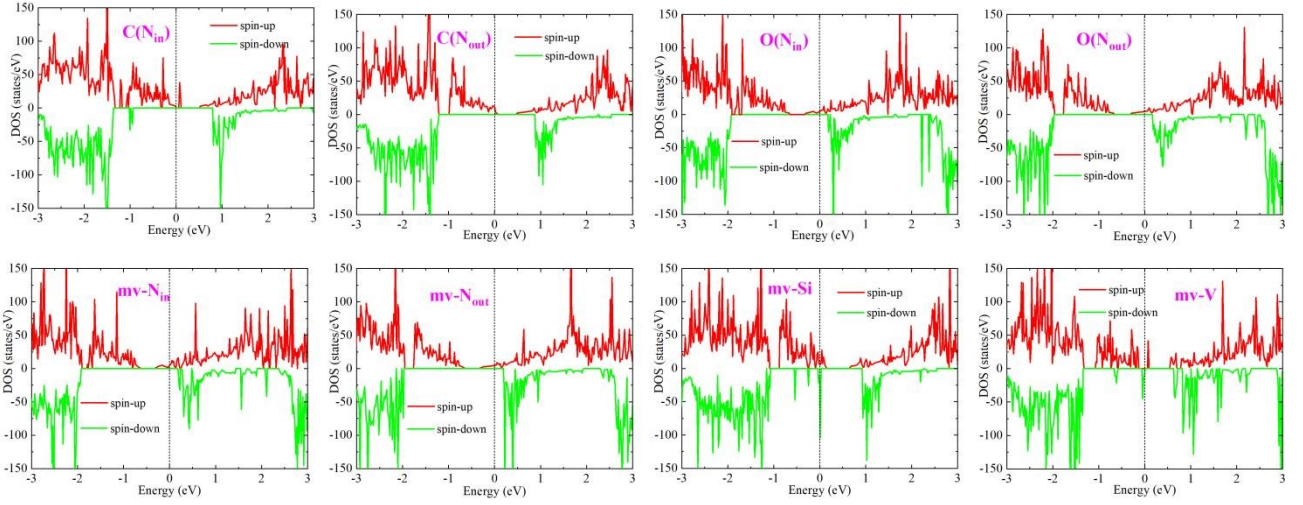

FIG. S4 The spin-polarized density of states of the doped and defected  $\text{VSi}_2\text{N}_4$  with  $5 \times 5 \times 1$  supercell. The red and green lines denote the spin-up and spin-down channels, respectively, and the Fermi level is set at zero energy.

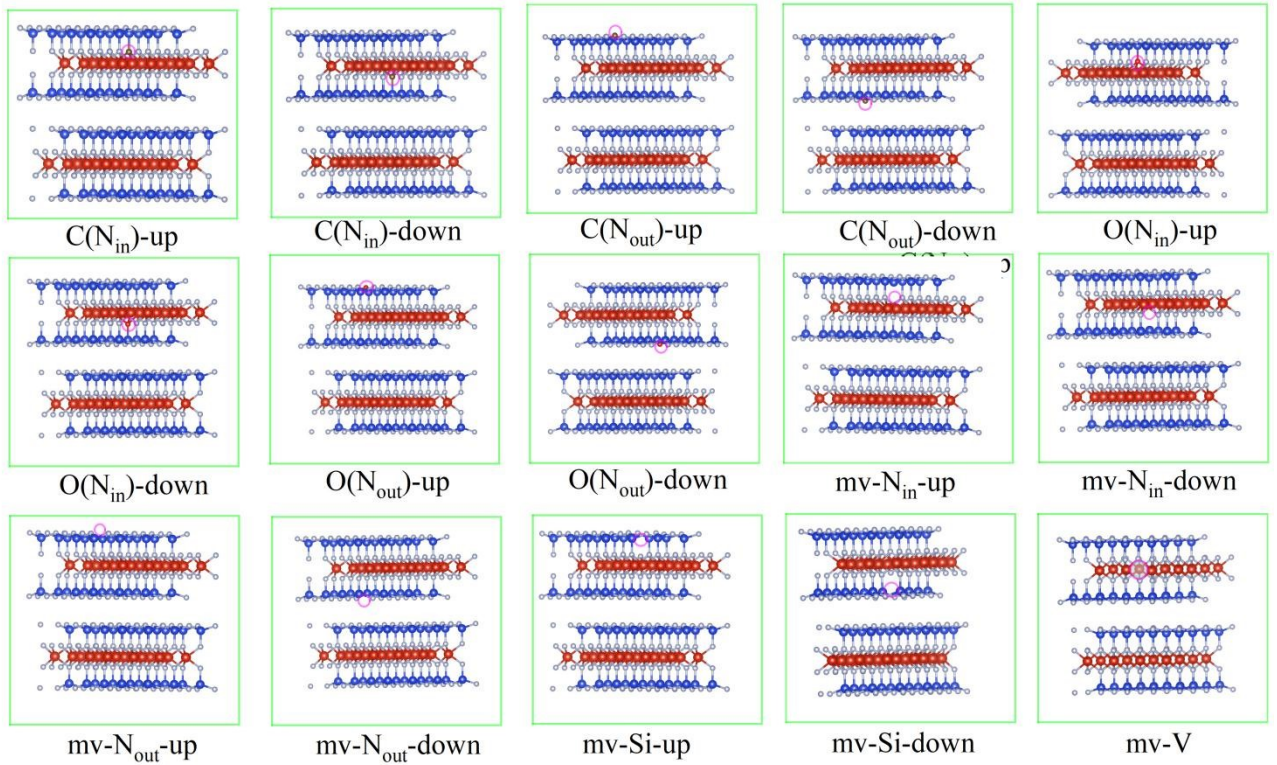

FIG. S5 Optimized structures of the defective  $\text{VSi}_2\text{N}_4$  bilayers with AB-stacking. The gray, blue, and red balls denote N, Si, and V atoms, respectively. The defects have been marked by the pink circle.

TABLE SI. Using GGA+ $U$  method, the calculated magnetic quantities of the defective  $\text{VSi}_2\text{N}_4$  using  $3\times 3\times 1$  supercell: total magnetic moment  $M_{\text{total}}$ , magnetic moment per V atom  $M_{\text{total/V}}$ , average magnetic moment of V surrounding defect (for the defective systems,  $M_V$  is calculated from the average of the neighboring V atoms)  $M_V$ , magnetic anisotropy energy  $E_{\text{MAE}}$ , and magnetic energy per V atom  $E_M$ .

|                              | $M_{\text{total}}(\mu_B)$ | $M_{\text{total/V}}(\mu_B/\text{V})$ | $M_V(\mu_B)$ | $E_{\text{MAE}}(\mu\text{eV}/\text{V})$ | $E_M(\text{meV}/\text{V})$ |
|------------------------------|---------------------------|--------------------------------------|--------------|-----------------------------------------|----------------------------|
| $\text{VSi}_2\text{N}_4$     | 9.00                      | 1.00                                 | 1.06         | -33.3                                   | 282.5                      |
| C( $\text{N}_{\text{in}}$ )  | 8.00                      | 0.89                                 | 0.81         | -15.6                                   | 242.1                      |
| C( $\text{N}_{\text{out}}$ ) | 9.15                      | 1.02                                 | 1.01         | -9.7                                    | 250.2                      |
| O( $\text{N}_{\text{in}}$ )  | 9.99                      | 1.11                                 | 1.14         | -56.1                                   | 226.5                      |
| O( $\text{N}_{\text{out}}$ ) | 9.42                      | 1.05                                 | 1.10         | -41.5                                   | 218.5                      |
| Mv- $\text{N}_{\text{in}}$   | 10.00                     | 1.11                                 | 1.25         | -19.5                                   | 206.8                      |
| mv- $\text{N}_{\text{out}}$  | 8.03                      | 0.89                                 | 0.67         | -20.1                                   | 222.5                      |
| mv-Si                        | 7.85                      | 0.87                                 | 0.59         | -1.3                                    | 171.3                      |
| mv-V                         | 6.45                      | 0.81                                 | 0.58         | 10.4                                    | 91.7                       |

TABLE SII. Using GGA+ $U$  method, the calculated magnetic quantities of the defective  $\text{VSi}_2\text{N}_4$  using  $5 \times 5 \times 1$  supercell: total magnetic moment  $M_{\text{total}}$ , magnetic moment per V atom  $M_{\text{total/V}}$ , average magnetic moment of V surrounding defect (for the defective systems,  $M_V$  is calculated from the average of the neighboring V atoms)  $M_V$ , magnetic anisotropy energy  $E_{\text{MAE}}$ , and magnetic energy per V atom  $E_M$ .

|                                    | $M_{\text{total}}(\mu_B)$ | $M_{\text{total/V}}(\mu_B/\text{V})$ | $M_V(\mu_B)$ | $E_{\text{MAE}}(\mu\text{eV}/\text{V})$ | $E_M(\text{meV}/\text{V})$ |
|------------------------------------|---------------------------|--------------------------------------|--------------|-----------------------------------------|----------------------------|
| $\text{VSi}_2\text{N}_4$           | 25.00                     | 1.00                                 | 1.06         | -33.2                                   | 282.6                      |
| $\text{C}(\text{N}_{\text{in}})$   | 24.00                     | 0.96                                 | 0.79         | -28.9                                   | 267.8                      |
| $\text{C}(\text{N}_{\text{out}})$  | 25.09                     | 1.00                                 | 1.04         | -13.3                                   | 270.6                      |
| $\text{O}(\text{N}_{\text{in}})$   | 26.00                     | 1.04                                 | 1.20         | -34.1                                   | 259.8                      |
| $\text{O}(\text{N}_{\text{out}})$  | 26.00                     | 1.04                                 | 1.12         | -36.2                                   | 264.9                      |
| $\text{MV}(\text{N}_{\text{in}})$  | 26.00                     | 1.04                                 | 1.14         | -36.2                                   | 262.7                      |
| $\text{MV}(\text{N}_{\text{out}})$ | 26.00                     | 1.04                                 | 1.12         | -27.8                                   | 249.7                      |
| $\text{MV}(\text{Si})$             | 23.11                     | 0.92                                 | 0.72         | -2.3                                    | 233.8                      |
| $\text{MV}(\text{V})$              | 22.02                     | 0.92                                 | 0.63         | -3.3                                    | 203.6                      |
